# Supplementary material for: Highly sensitive thin film phototransistors based on a copolymer of benzodithiophene and diketopyrrolopyrrole
Source: Royal Society of Chemistry journal article supplement (doi:10.1039/c4tc02462a), 2014-12-17
Supplement: c4tc02462a1.pdf [file c4tc02462a1.pdf]

Electronic Supplementary Information for:

**Highly sensitive thin film phototransistors based on a copolymer of  
benzodithiophene and diketopyrrolopyrrole**

Lanchao Ma,<sup>a, d</sup> Zhengran Yi,<sup>b</sup> Shuai Wang,<sup>\*b</sup> Yunqi Liu,<sup>\*a</sup> Xiaowei Zhan<sup>\*a, c</sup>

<sup>a</sup> Beijing National Laboratory for Molecular Sciences and CAS Key Laboratory of Organic Solids,  
Institute of Chemistry, Chinese Academy of Sciences, Beijing 100190, China. E-mail:

[xwzhan@iccas.ac.cn](mailto:xwzhan@iccas.ac.cn) (X.Z.), [liuyq@iccas.ac.cn](mailto:liuyq@iccas.ac.cn) (Y.L.)

<sup>b</sup> College of Chemistry and Chemical Engineering and Ministry of Education Key Laboratory for  
Large-Format Battery Materials and System, Hubei Key Laboratory of Material Chemistry and  
Service Failure, Huazhong University of Science and Technology, Wuhan, 430074, China. E-mail:

[chmsamuel@mail.hust.edu.cn](mailto:chmsamuel@mail.hust.edu.cn) (S.W.)

<sup>c</sup> Department of Materials Science and Engineering, College of Engineering, Peking University,  
Beijing 100871, China.

<sup>d</sup> University of Chinese Academy of Sciences, Beijing 100049, China.

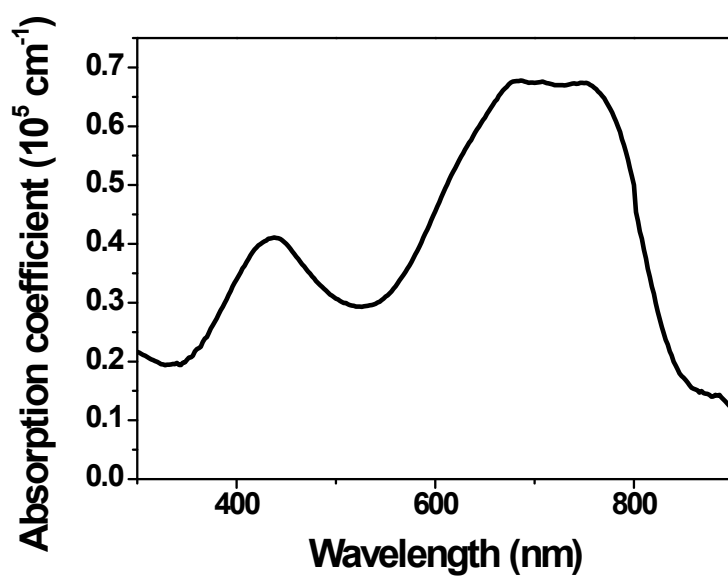

**Fig. S1** The absorption coefficient of P(DPP4T-co-BDT) thin film on quartz substrate.

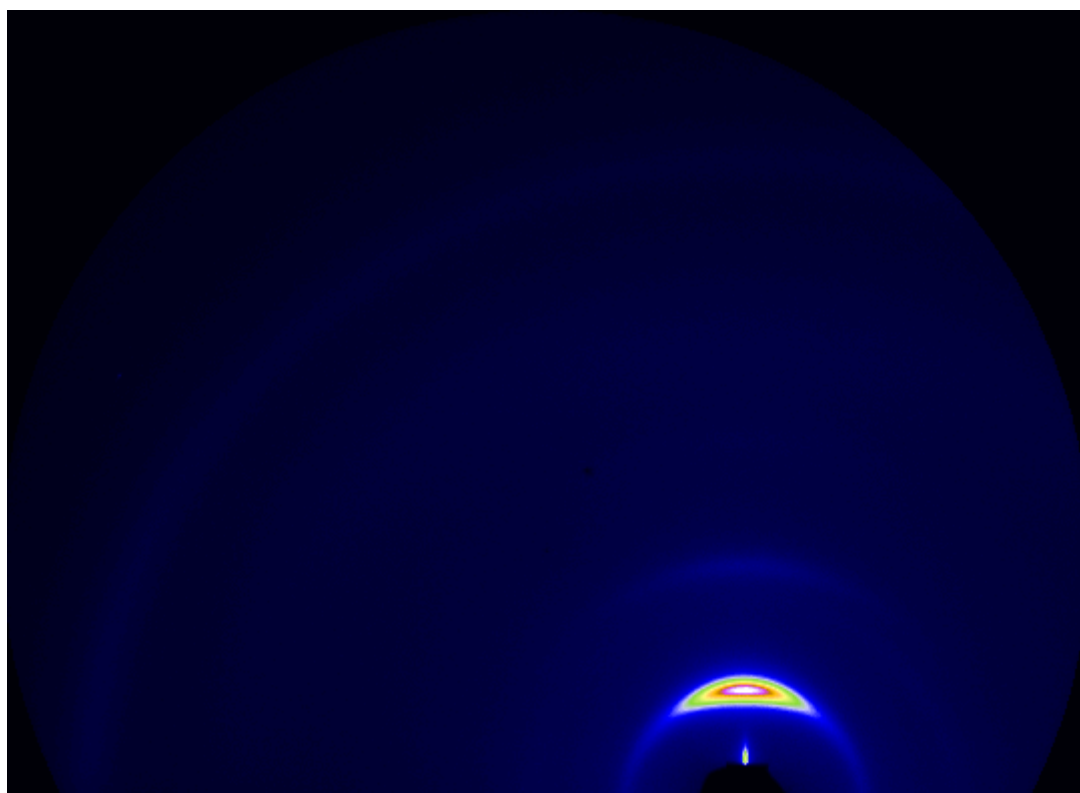

**Fig. S2** 2D GIXRD image of P(DPP4T-co-BDT) thin films on OTS-treated  $\text{SiO}_2/\text{Si}$  substrates after thermal treatment at 200 °C.

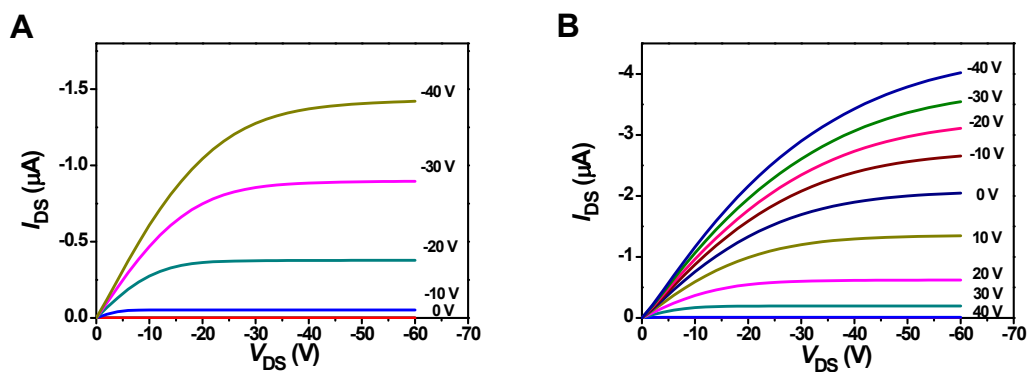

**Fig. S3** The output characteristics of the OTFPTs (A) in the dark and (B) under white light irradiation with a power of  $9.7 \mu\text{W}/\text{cm}^2$ .

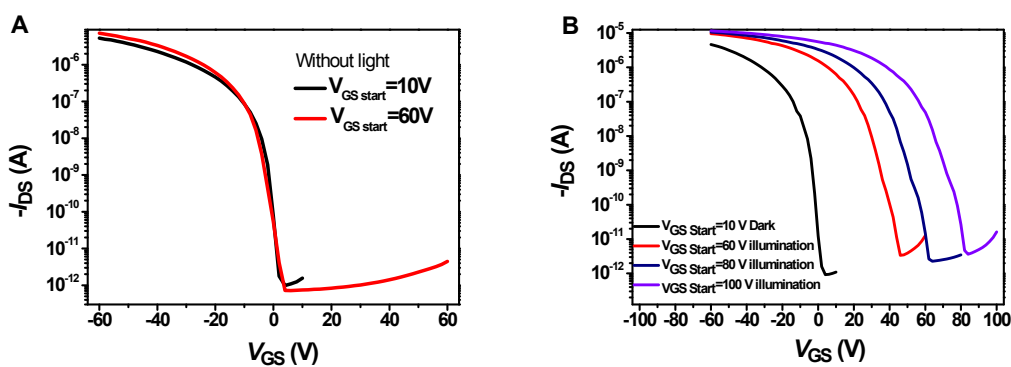

**Fig. S4** The transfer curves of OTFPTs with different started gate voltage ( $V_{GS \text{ start}}$ ) in dark (A) and under illumination (B).

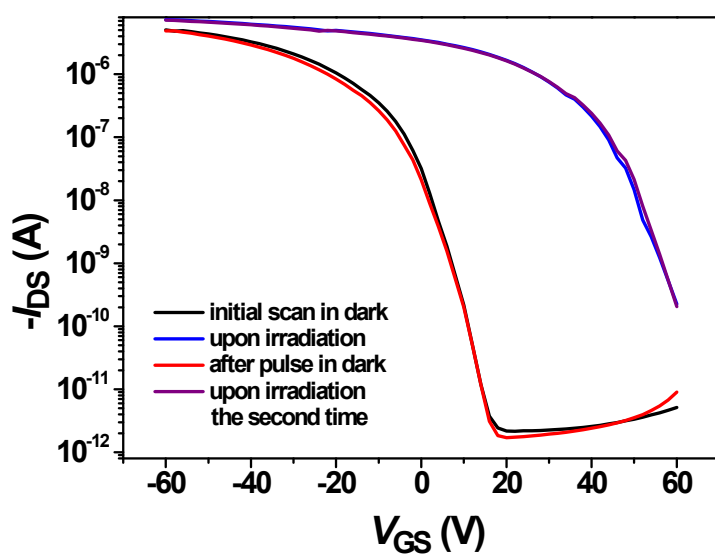

**Fig. S5** The reversibility of the OTFPTs.

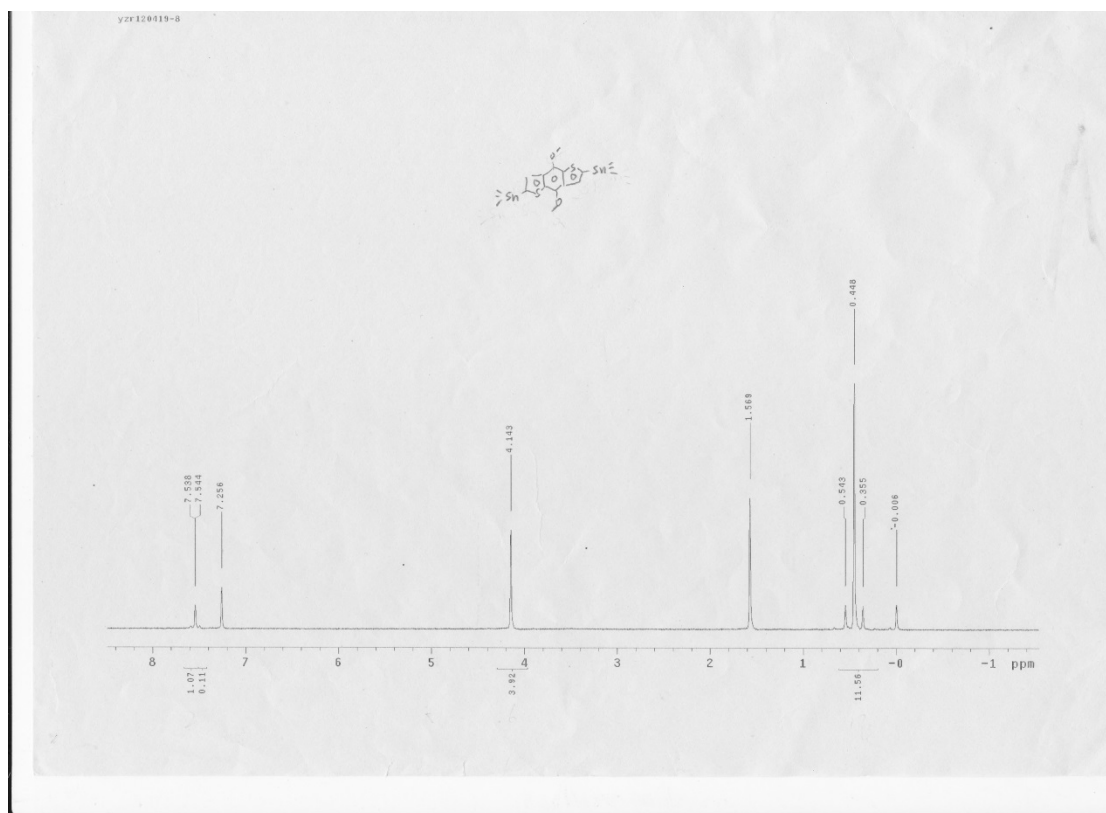

**Figure S6.**  $^1\text{H NMR}$  spectrum of 2.

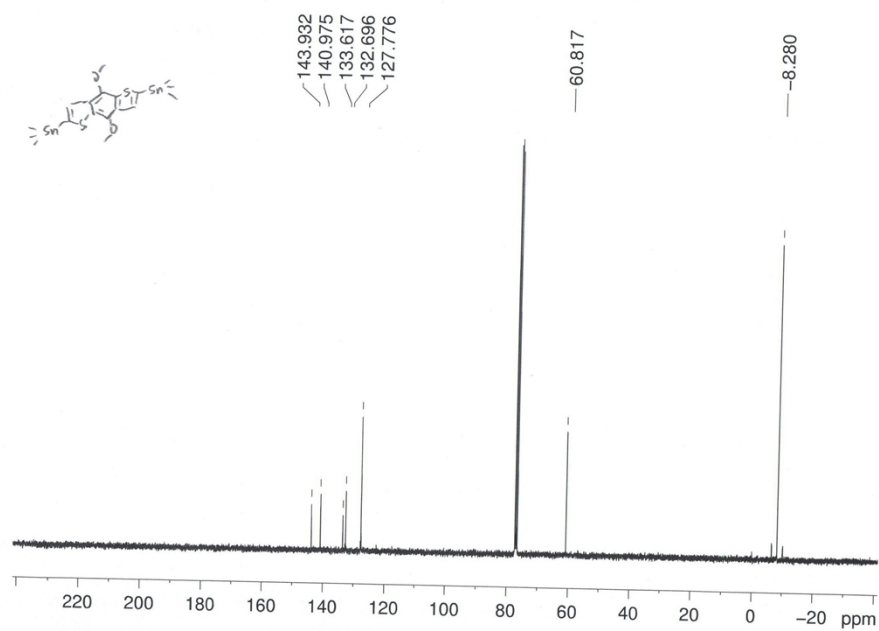

**Fig. S7**  $^{13}\text{C}$  NMR spectrum of **2**.

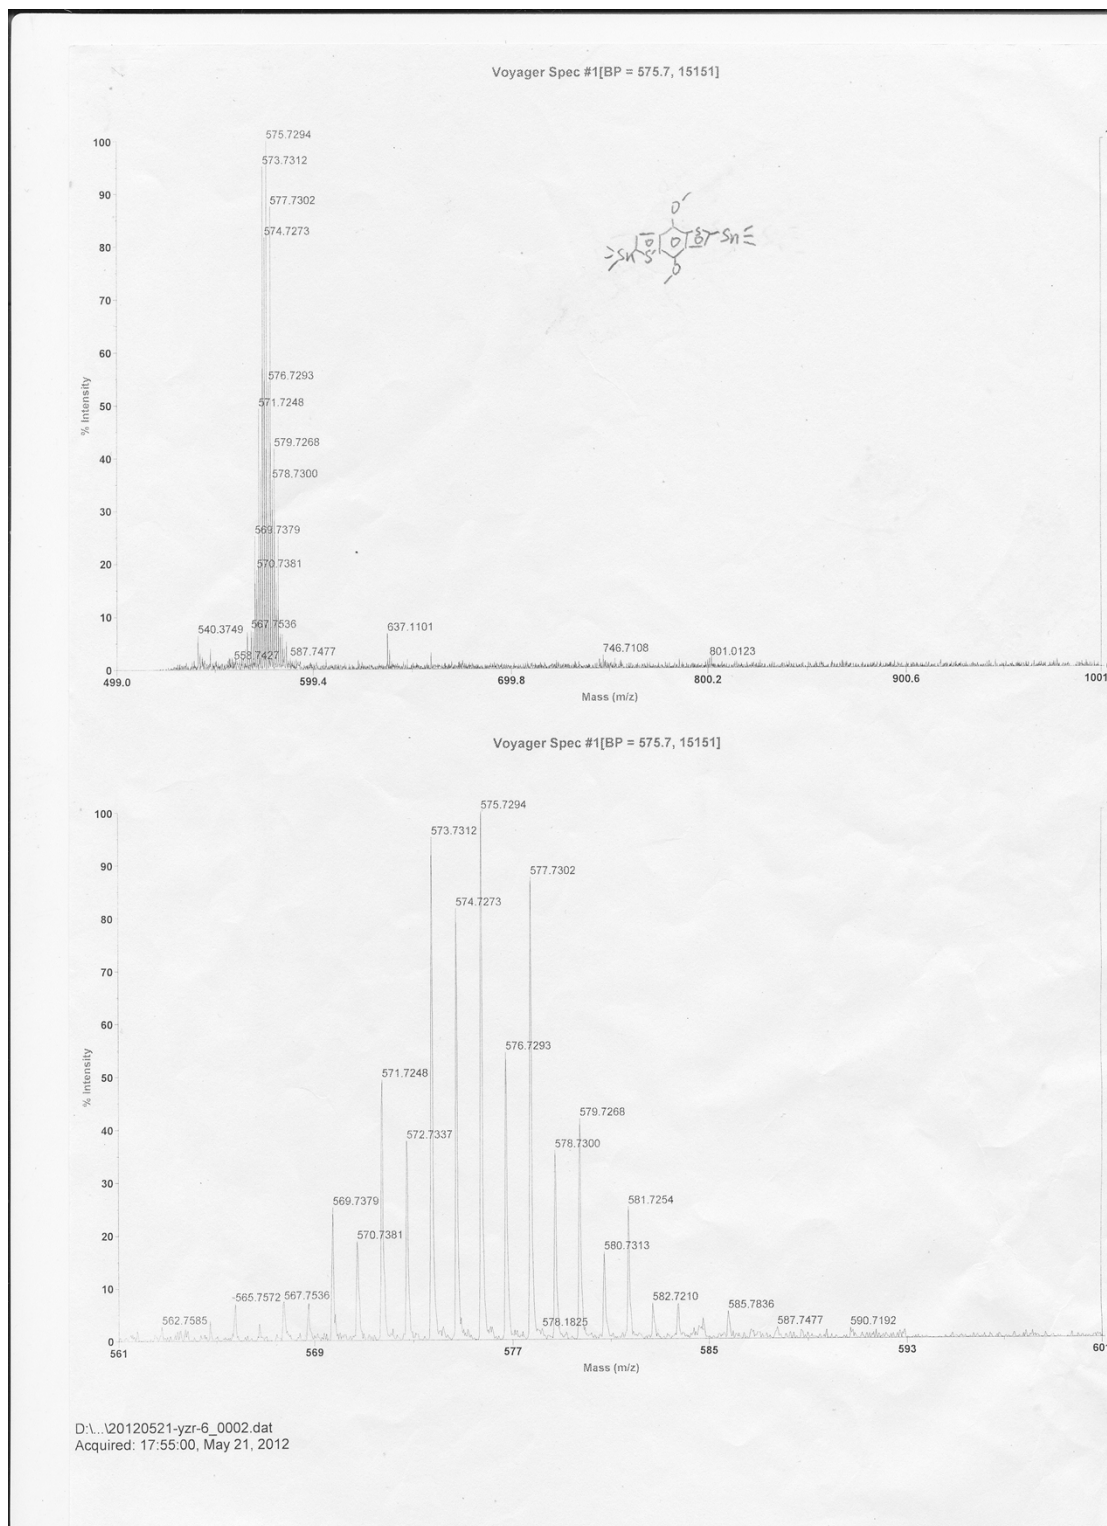

Fig. S8 MALDI-TOF of 2.
